# Supplementary material for: Dynamic ubiquitination determines transcriptional activity of the plant immune coactivator NPR1
Source: eLife journal article supplement (doi:10.7554/elife.47005), 2019-10-07

**A**

| Inhibitor | Structure                                                                         | Proposed human targets          | Arabidopsis homologues                            |
|-----------|-----------------------------------------------------------------------------------|---------------------------------|---------------------------------------------------|
| PR619     | 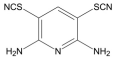 | broad spectrum                  |                                                   |
| NSC632839 |  | broad spectrum                  |                                                   |
| WP1130    |  | USP5<br>USP9x<br>USP14<br>UCH37 | UBP14<br>UBP12, UBP13<br>UBP6, UBP7<br>UCH1, UCH2 |
| P22077    |  | USP7<br>USP47                   | UBP12, UBP13<br>UBP12, UBP13                      |
| TCID      |  | UCH-L3                          | UCH3                                              |

**B**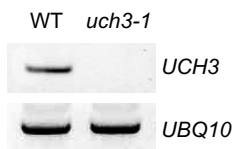**C**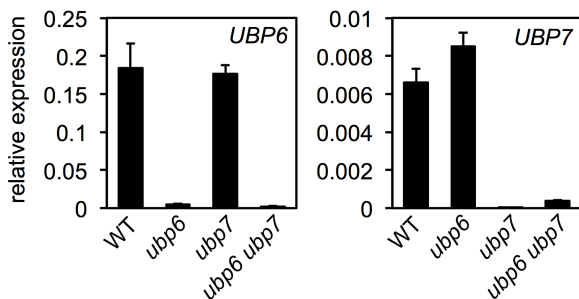

Supplement: supp [file elife_poa_e47005_Figure_5_figure_supplement_1.pdf › elife_poa_e47005_Figure_5_figure_supplement_1.pdf]
