# Supplementary material for: Dynamic ubiquitination determines transcriptional activity of the plant immune coactivator NPR1
Source: eLife journal article supplement (doi:10.7554/elife.47005), 2019-10-07
Supplement: supp [file elife_poa_e47005_Figure_5_figure_supplement_2.pdf › elife_poa_e47005_Figure_5_figure_supplement_2.pdf]

# A

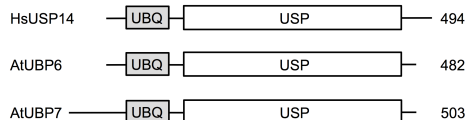

# B

Hs\_USP14 1 MP-----T-----TSV

Sc\_UBP6 1 GS-----TQFNN

At\_UBP6 1 MP-----T-----TVS

At\_UBP7 1 LKVKDPNPQPGSTHPVRLIAYIETKKEEERKFFFDIACLGPFKEINLVLSQHQTITVTS

Hs\_USP14 8 VKWKEKEKFEGLNTDTEPPMVFAQLFALTGVQPAROKVMVGGLLKDD-DWENIKIKNG

Sc\_UBP6 10 LRHSGKV-YFPLSTDTATSADLTKSABELTQVPSAROKVMVGGLSGEESIKIYPLIKFG

At\_UBP6 6 VKWQKVKVLNGEIDVSLPPVFAQLYDLTGVPVPRQKIMVVGGLLKDDDWAAIGKFG

At\_UBP7 61 VKWQKVKVFESTIDTSCPPVFAQLYDLSGVPPRQKIMVVGGLLKDDADNSTGLKNG

Hs\_USP14 67 MTLMMGSADA-PEEPSSAKTVFVEDLPEEQ-LASAEPLPGLTNLGNTYMNATVQCIR

Sc\_UBP6 69 STVNLIGTIDANLITSPARKNNITDLAPEQQQQFAQLPVGFKNMGNTYINATLQALY

At\_UBP6 66 KKLMMMGTADE-LVKAPEKAIIVFAEDLPEEA-LAINLGYSGALVNLGNTYMNSTVQCLL

At\_UBP7 121 KKLMMMGTADE-LVKAPEKGGVFEMDLPEEQQAANLGYSGALVNLGNTYMNSTVQCLL

Hs\_USP14 125 SVPELKDALKRYAGALRA---SGEMASA-QYTAARLRLFDVSKTSSTSPETILLQPE

Sc\_UBP6 129 RVNLLRDMILNLYNPSQGVNSNGACPEETHKQVTEMRCFENPNKSEKSVPIILLNTL

At\_UBP6 124 SVPELKSALSNYSLARS---NVDQDTS-HMITVATRELSESELDSVSNVASESOFMVVL

At\_UBP7 179 SVPELKSLSNYSASAR---KVDQDTS-HMITVATRELSESELDKSVKAVAPLFFMVVL

Hs\_USP14 180 HMAIPQFAEK-GEAGGYLOQDAECWITOMLRVLOKLEAIEDDSVKETDSSSASAPFSPK

Sc\_UBP6 189 RKKYQFAERDSGGGYKQDAEELTOLPHSMVIF-----GD-----

At\_UBP6 177 KKKYQFQSLQ---LNGMHMQDAECCWITOLYTLQSIL-----KAPTSSE

At\_UBP7 233 KKKYQFAQL---HNGMHMQDAECCWITOLYTLQSIL-----KPSPSSE

Hs\_USP14 239 KKSILDQFGVGFETTKQTESPEEVKKGKNQLQSLSGEINCEVKYLYFTGLKLHLOPE

Sc\_UBP6 228 ---KFSDEPRKFKPTIDTANNNITVKNESDSKLCHISGTINFWNGLETSINEK

At\_UBP6 221 GADAVKALPGVNLQRLCOESSEE---SSETESVSLKCHISHEVNLHLEGLKGLKCE

At\_UBP7 275 DPDAVKALFGLNLLNLCOESSEE---SSETESVSLKCHISHEVNLHLEGLKGLKCE

Hs\_USP14 299 KTSPLIQRNALYKSSKISRLPAYLTQVVRFFWKRESVNAKILKDKVPLMLDIYEL

Sc\_UBP6 285 EKTSPLIDTANSYVSKKISRLPAYLTQVVRFFWKRESNOKATILRKVDVPLVLDIADI

At\_UBP6 279 EKTSPLALGRATLYVKESLIDSLPRYLTVQVVRFFWKRESNOKATILRKVDVPLVLDIADI

At\_UBP7 333 EKTSPLILGRATLYVKESLIDSLPRYLTVQVVRFFWKRESNOKATILRKVDVPLVLDIADI

Hs\_USP14 359 CPELLOEKVVSFRSEKDDPEKKVNCQNTSDAKS-SPOKEVRVYEPFS-PAD-----

Sc\_UBP6 345 LPELYAAEKVKVRLDEEVEKKEKEREKIKRKLDPSSSENWMTPEQYEVQVNLNSEE

At\_UBP6 339 CPELRLKLEAPRQKRLDEEVEKGLGLQASA-RSG-SKGDVVKMTDAEASANGSGE-SST

At\_UBP7 393 CPELRLKLEAPRQKRLDEEVEKGLGLQASA-RSG-SKGDVVKMTDAEASANGSGE-SST

Hs\_USP14 409 -----DI-----GNNCSEYDLQAVLTHQGRSSSGHYVSVWVKR--C

Sc\_UBP6 405 DQWLEEYKHHFFPNLEK-----GNPSCVYILVTHQANESGSHYATHTDLDE

At\_UBP6 395 VNP-----QEGTSSEKHTGTGYLDVAVLTHKGRSADSGHYVAVWVKQ--S

At\_UBP7 449 GDQ-----QEGA-----SPHMTGYLDVSLVTHKGRSADSGHYVAVWVKQ--S

Hs\_USP14 445 DEWIKRDDDKVSVETPEDIHLSSGGGDWHIAYLIYGFRRVPELMEEESEQ

Sc\_UBP6 459 NKWYKNDKDVSVVEKEEHLSSGGGSDSAITILMYKEFG-----

At\_UBP6 440 GKWIQDDDNESVQREEDITKLSSGGGDWHMAYITMYKARVSM-----

At\_UBP7 490 GKWIQDDDNESVQREEDITKLSSGGGDWHMAYITMYKARVSM-----
