# Supplementary figures and images for: Dynamic ubiquitination determines transcriptional activity of the plant immune coactivator NPR1
Source: eLife journal article supplement (doi:10.7554/elife.47005), 2019-10-07

WT    *ube4-2*

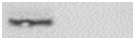

*UBE4*

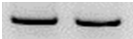

*UBQ10*

Supplement: supp [file elife_poa_e47005_Figure_1_figure_supplement_1.pdf › elife_poa_e47005_Figure_1_figure_supplement_1.pdf]

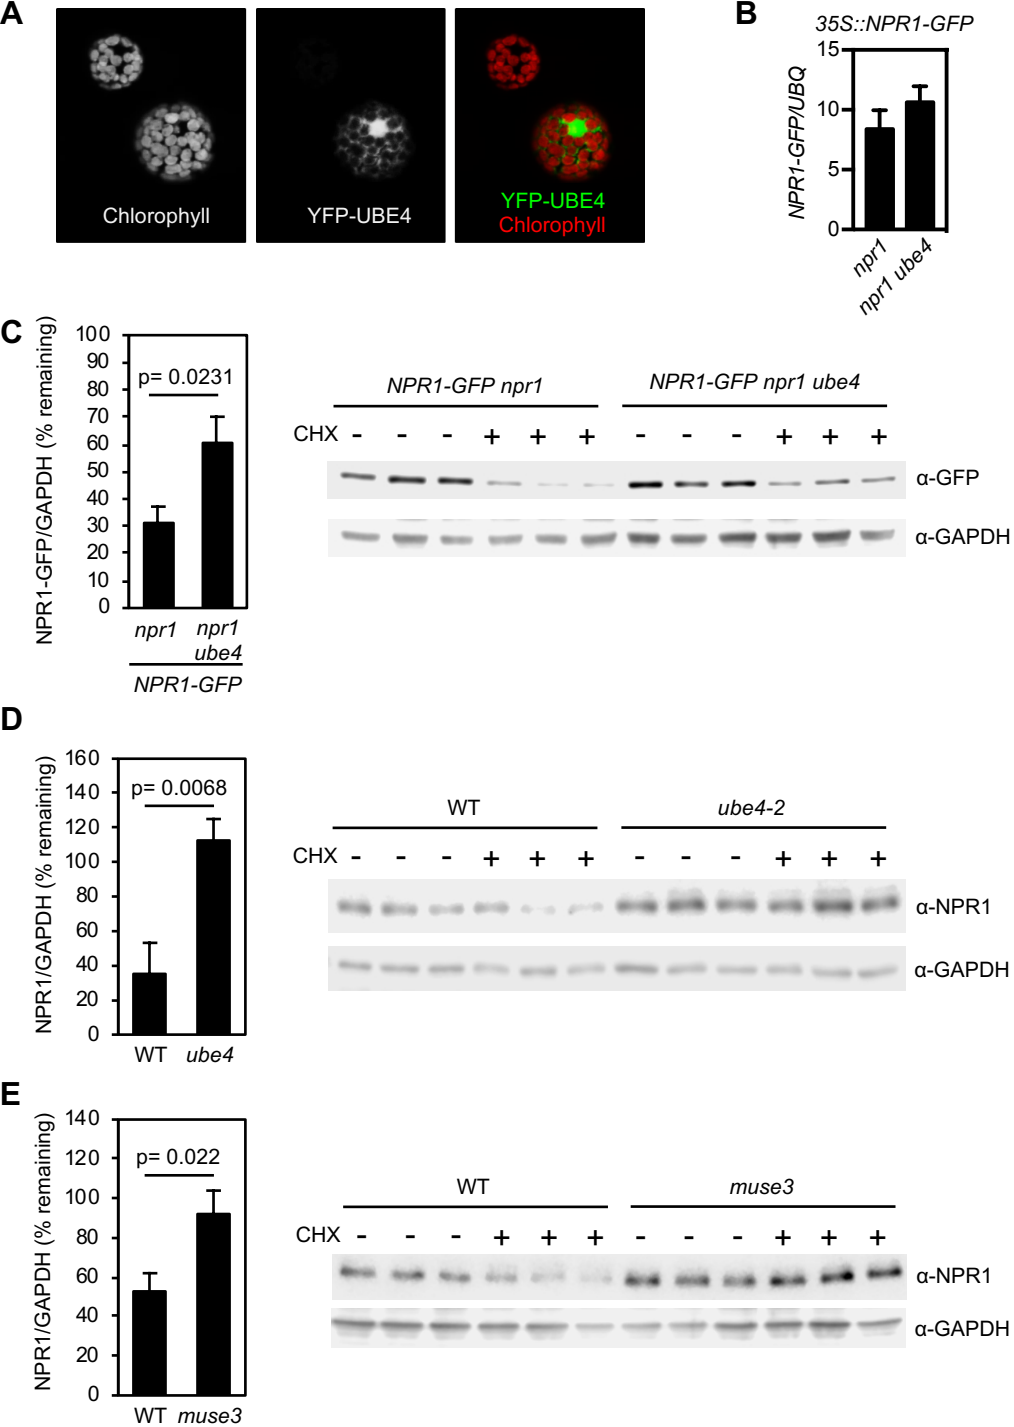

Supplement: supp [file elife_poa_e47005_Figure_2_figure_supplement_1.pdf › elife_poa_e47005_Figure_2_figure_supplement_1.pdf]

**A**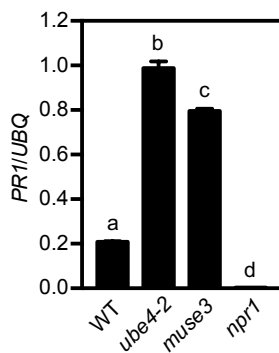**B**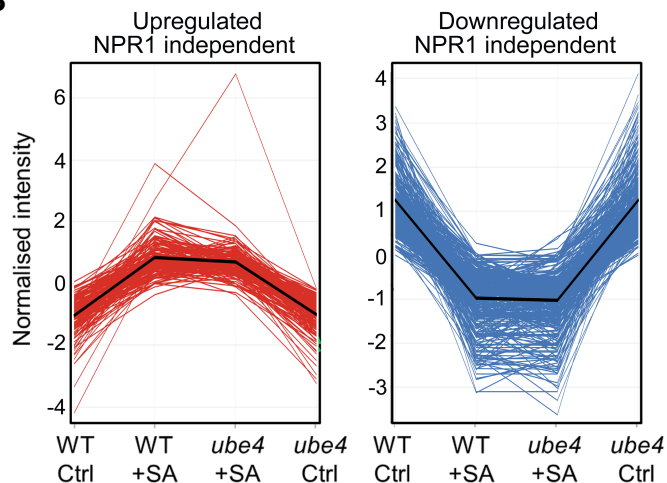**C**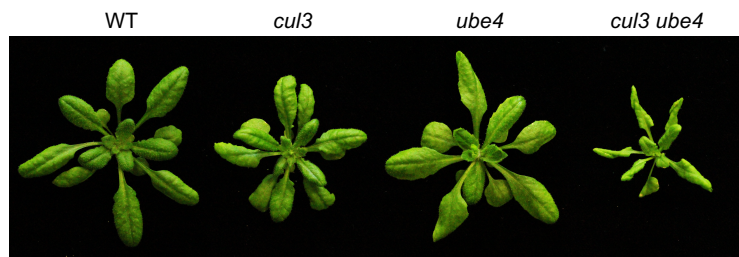**D**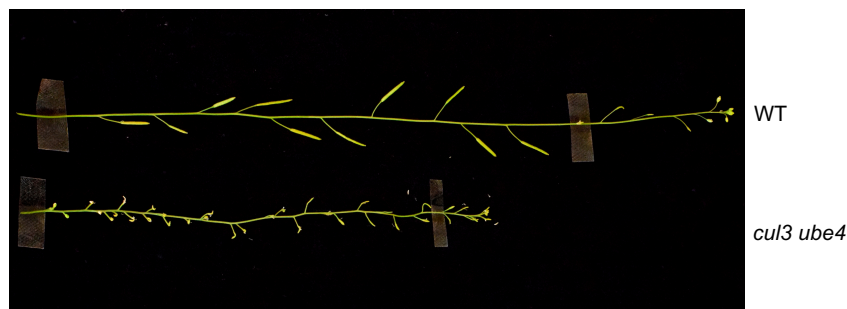**E**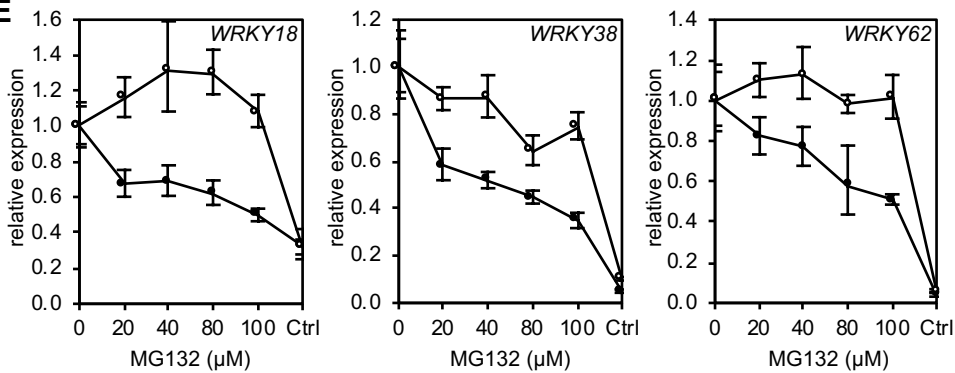

Supplement: supp [file elife_poa_e47005_Figure_3_figure_supplement_1.pdf › elife_poa_e47005_Figure_3_figure_supplement_1.pdf]

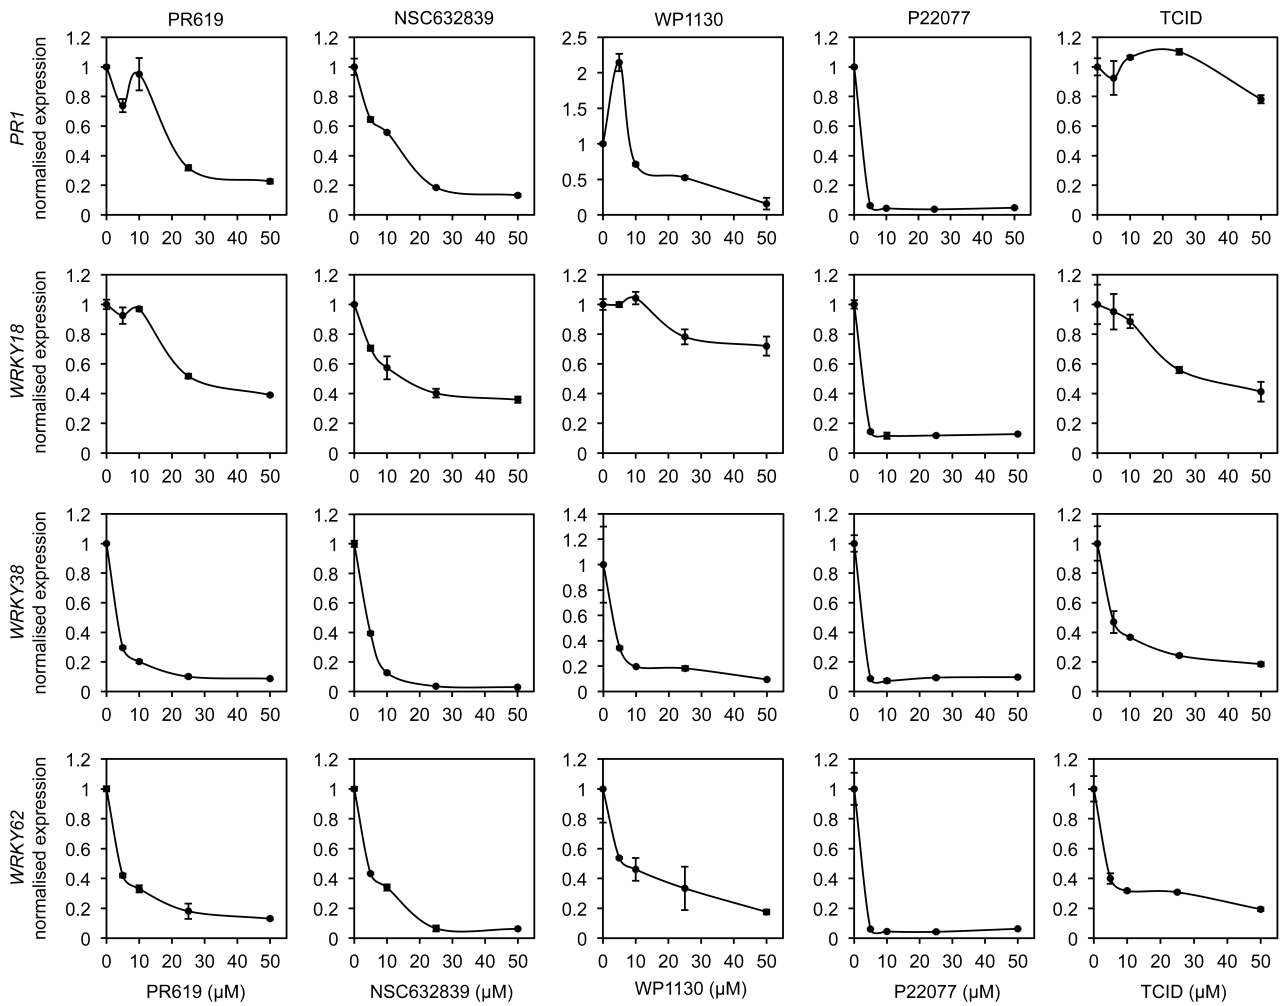

Supplement: supp [file elife_poa_e47005_Figure_4_figure_supplement_1.pdf › elife_poa_e47005_Figure_4_figure_supplement_1.pdf]

**A**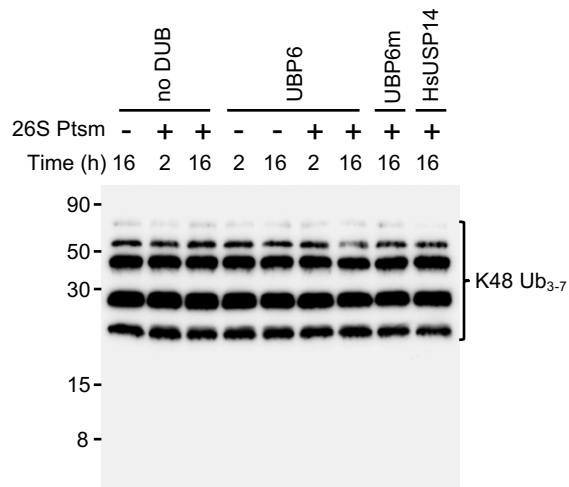**B**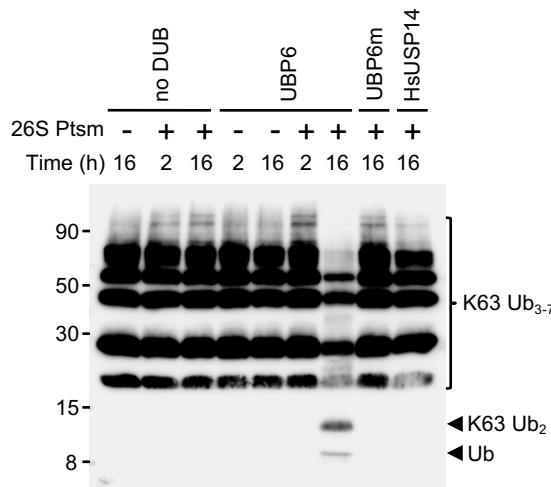**C**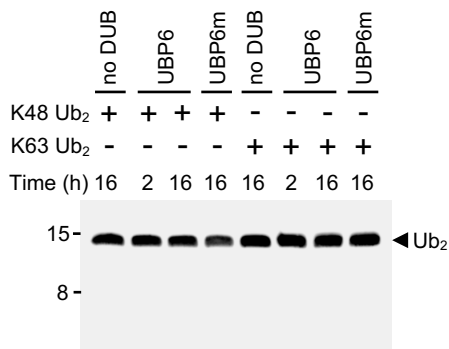**D**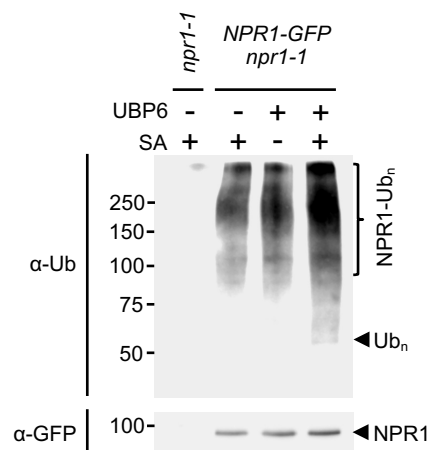**E**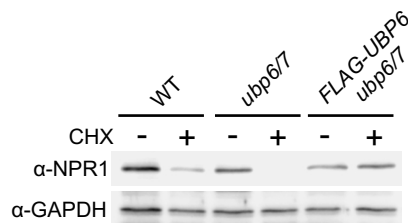

Supplement: supp [file elife_poa_e47005_Figure_6_figure_supplement_1.pdf › elife_poa_e47005_Figure_6_figure_supplement_1.pdf]
